# Supplementary material
Source: MDPI journal article supplement (https://www.mdpi.com/2673-9623/3/4/29)
Supplement: s1 [file s1]

Archive with 6 entries (6 files):
- ApplChem_Supplementary material_completed.pdf
- Report S1_BET isoterm_Zt.pdf
- Report S4_BET_isoterm_Zt-16F.pdf
- Report S5_BET isoterm_F.pdf
- Report_S2_BET isoterm_Zt-2F.pdf
- Report_S3-BET isoterm_Zt-8F.pdf
